# Supplementary material for: Fear of Recurrence in Young Adult Cancer Patients—A Network Analysis
Source: MDPI journal article supplement (doi:10.3390/cancers14092092), 2022-04-22
Supplement: s1 [file s1]

# Fear of Recurrence in Young Adult Cancer Patients—A Network Analysis

Diana Richter, Katharina Clever, Anja Mehnert-Theuerkauf and Antje Schönfelder

**Table S1.** Mean scores and standard deviations of the FoP-Q-12 items.

| Item                                                                                        | Mean | SD   |
|---------------------------------------------------------------------------------------------|------|------|
| 1. Being afraid of disease progression                                                      | 3.14 | 1.1  |
| 2. Being nervous prior to doctors' appointments or periodic examinations                    | 3.68 | 1.29 |
| 3. Being afraid of pain                                                                     | 2.71 | 1.30 |
| 4. Being afraid of becoming less productive at work                                         | 3.17 | 1.28 |
| 5. Having physical symptoms, e.g., rapid heartbeat, stomach ache, nervousness               | 3.45 | 1.26 |
| 6. Being afraid by the possibility that the children could contract cancer                  | 2.49 | 1.51 |
| 7. Being afraid of relying on strangers for activities of daily living                      | 2.66 | 1.33 |
| 8. Being afraid of no longer be able to pursue hobbies                                      | 2.60 | 1.28 |
| 9. Being afraid of severe medical treatments in course of the illness                       | 2.98 | 1.25 |
| 10. Worrying that medications could damage the body                                         | 3.10 | 1.38 |
| 11. Worrying about what will become of the family if something should happen to the patient | 3.21 | 1.37 |
| 12. Being afraid of not being able to work anymore                                          | 2.70 | 1.40 |

SD: standard deviation.

**Table S2.** Regularized partial correlation coefficients of the edges.

| Item | 1     | 2     | 3     | 4     | 5     | 6     | 7     | 8     | 9     | 10    | 11    | 12 |
|------|-------|-------|-------|-------|-------|-------|-------|-------|-------|-------|-------|----|
| 1    |       |       |       |       |       |       |       |       |       |       |       |    |
| 2    | 0.25* |       |       |       |       |       |       |       |       |       |       |    |
| 3    | 0.11* | 0.09* |       |       |       |       |       |       |       |       |       |    |
| 4    | 0     | 0.05* | 0.08* |       |       |       |       |       |       |       |       |    |
| 5    | 0.02* | 0.25* | 0.09* | 0.08* |       |       |       |       |       |       |       |    |
| 6    | 0     | 0.03* | 0.14* | 0     | 0.01* |       |       |       |       |       |       |    |
| 7    | 0     | 0     | 0.19* | 0.09* | 0.06* | 0     |       |       |       |       |       |    |
| 8    | 0     | 0     | 0.07* | 0.11* | 0     | 0     | 0.20* |       |       |       |       |    |
| 9    | 0.15* | 0.09* | 0.14* | 0.10* | 0     | 0     | 0.15* | 0.23* |       |       |       |    |
| 10   | 0.15* | 0     | 0     | 0     | 0.05* | 0     | 0.05* | 0     | 0.30* |       |       |    |
| 11   | 0.17* | 0.15* | 0     | 0     | 0     | 0.29* | 0.12* | 0     | 0.07* | 0.05* |       |    |
| 12   | 0     | 0     | 0     | 0.38* | 0.09* | 0     | 0.05* | 0.05* | 0.10* | 0.04* | 0.01* |    |

\*  $p < 0.05$ .

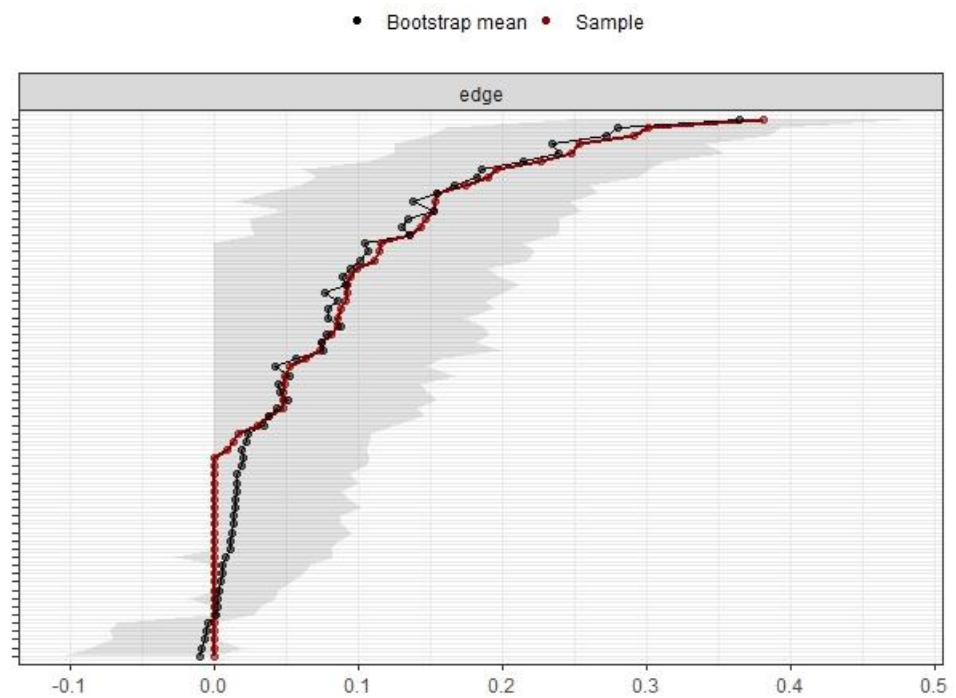

**Figure S1.** Bootstrapped confidence intervals of estimated edge-weights for the estimated network of FoP-SF items. The red line shows the sample values and the gray area the bootstrapped confidence intervals. Each horizontal line represents one edge. Smaller confidence intervals indicate more accurate edge estimates.

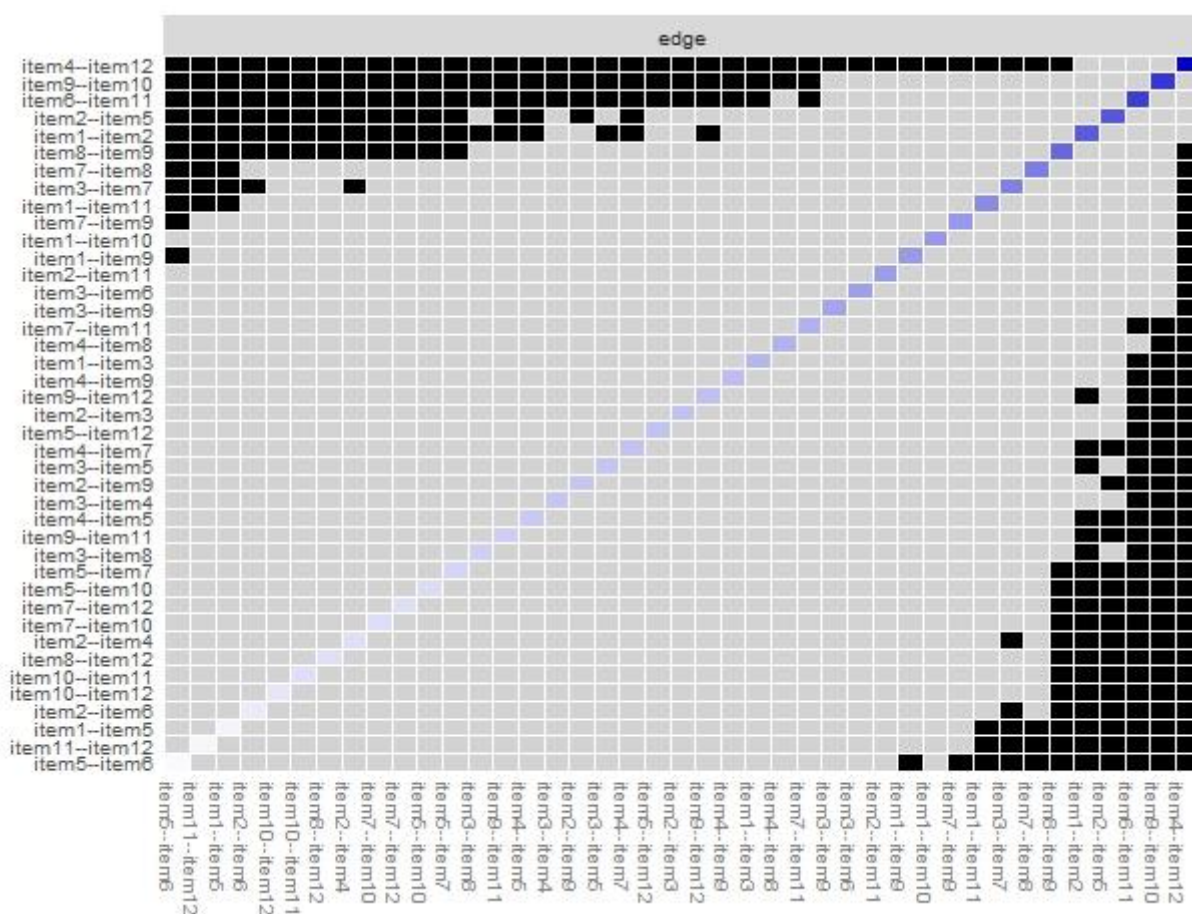

**Figure S2.** Bootstrapped stability test for edge-weights. The color of the boxes shows whether edge-weights differ significantly from each other (i.e., black) or do not differ significantly (i.e., grey). The diagonal line indicates the strength of edge-weights, shifting from blue ((representing stronger edges), to white (representing weaker edges).

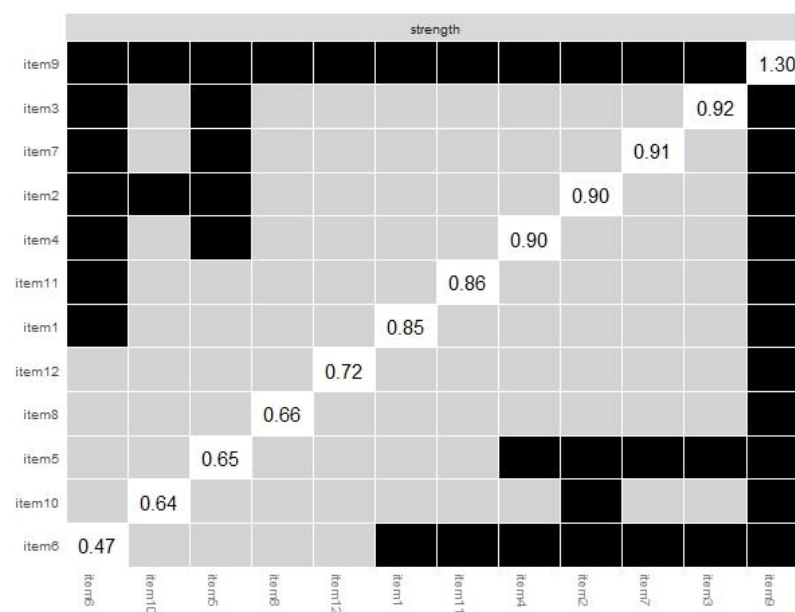

**Figure S3.** Standardized node strength centrality for FoP-SF items. Black boxes represents a significant difference in node strength for each pairing, grey boxes a non-significant difference. The number in the white boxes (diagonal line) shows the value of node strength of a specific node.
